# Supplementary material for: Insight into a Nitrogen-Doping Mechanism in a Hard-Carbon-Microsphere Anode Material for the Long-Term Cycling of Potassium-Ion Batteries
Source: MDPI journal article supplement (doi:10.3390/ma15124249), 2022-06-15
Supplement: s1 [file s1]

## **Support Information**

### **Insight to Nitrogen-doping Mechanism in Hard Carbon Microspheres Anode Material for Long-term Cycling Potassium-Ion Batteries**

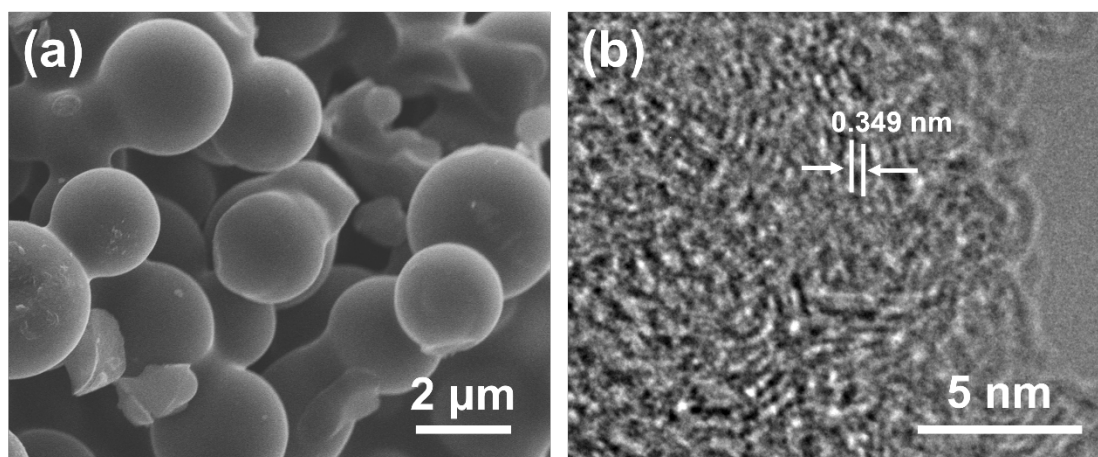

**Figure S1.** (a) SEM and (b) TEM images of SHC.

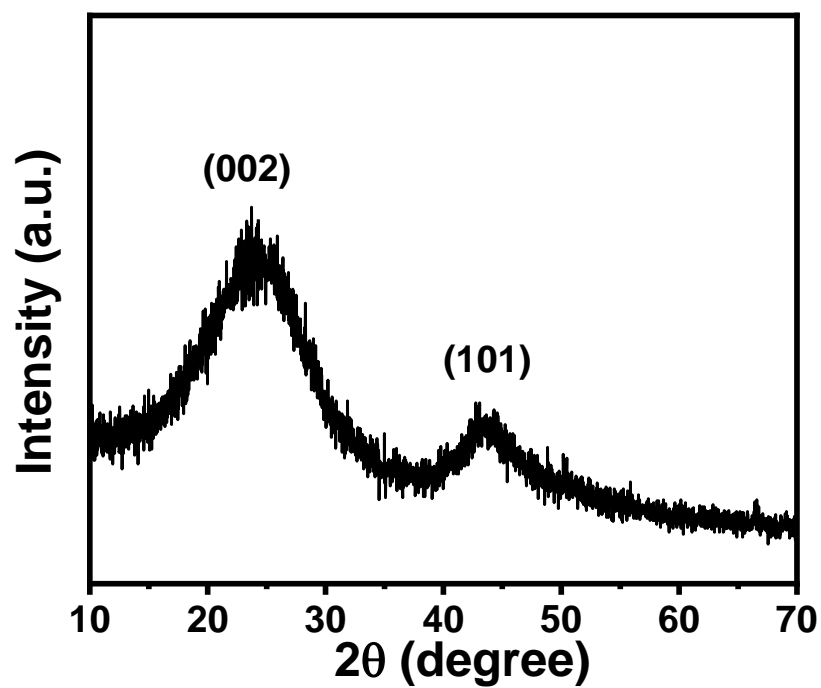

Figure S2. XRD pattern of SHC.

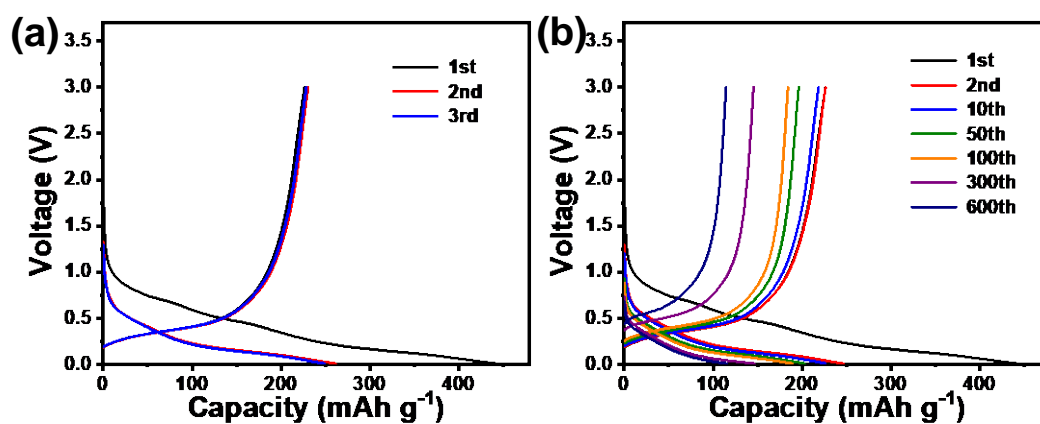

Figure S3. (a) The initial charge-discharge profiles of SHC. And (b) Charge-discharge profiles of SHC at various cycles.

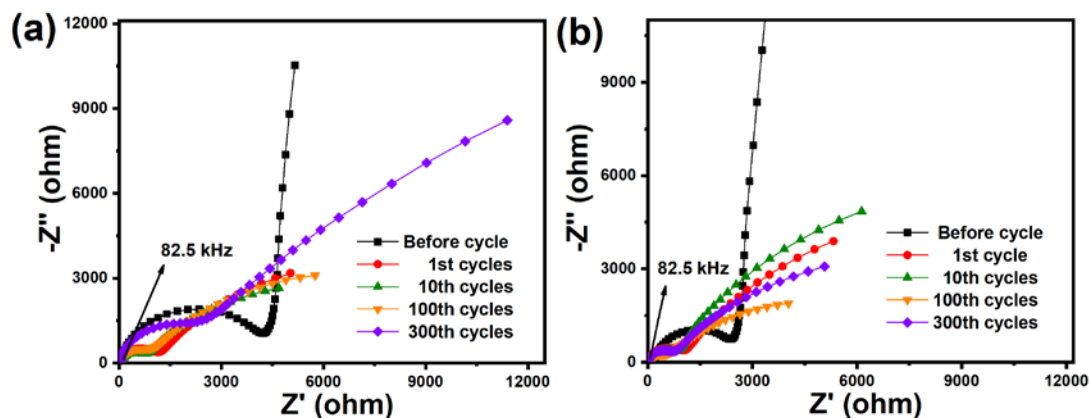

**Figure S4.** EIS Nyquist plots of (a) SHC and (b) N-SHC after various cycles.

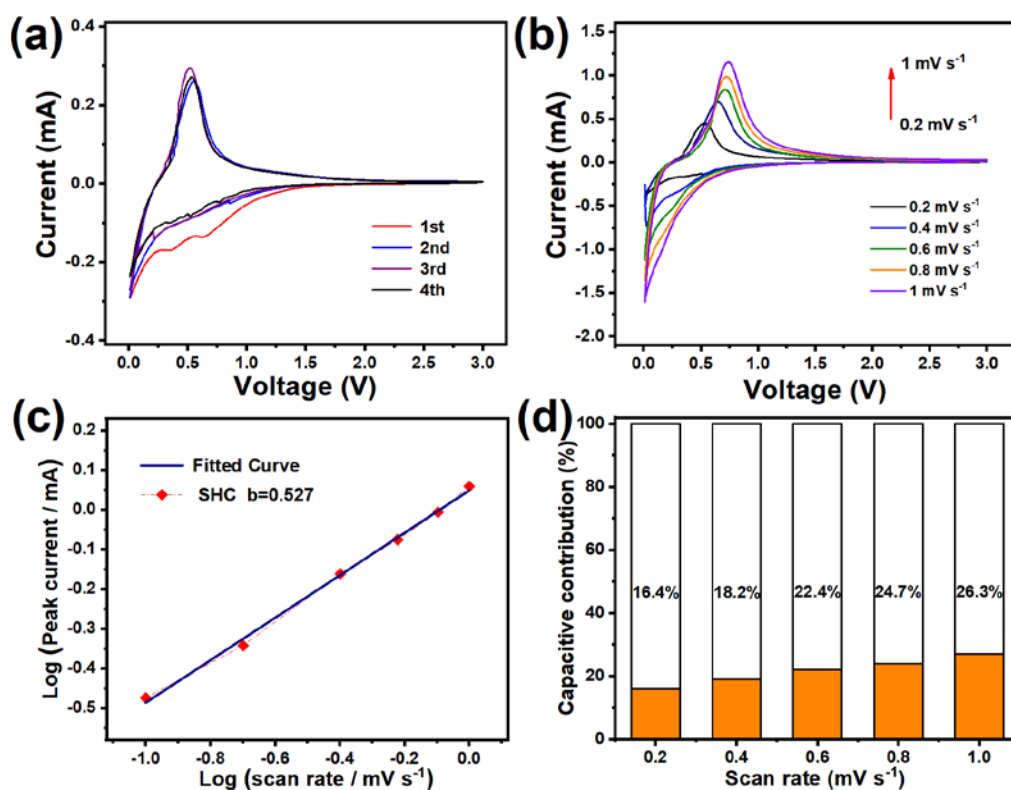

**Figure S5.** (a) The initial CV curves of SHC at the scan rate of 0.1 mV s<sup>-1</sup>. (b) CV curves of SHC at scan rates from 0.2 to 1 mV s<sup>-1</sup>, corresponding (c) Relationship between log (peak current) versus log (scan rate) and (d) calculated normalized percentages of capacitive capacities contribution at various scan rates.

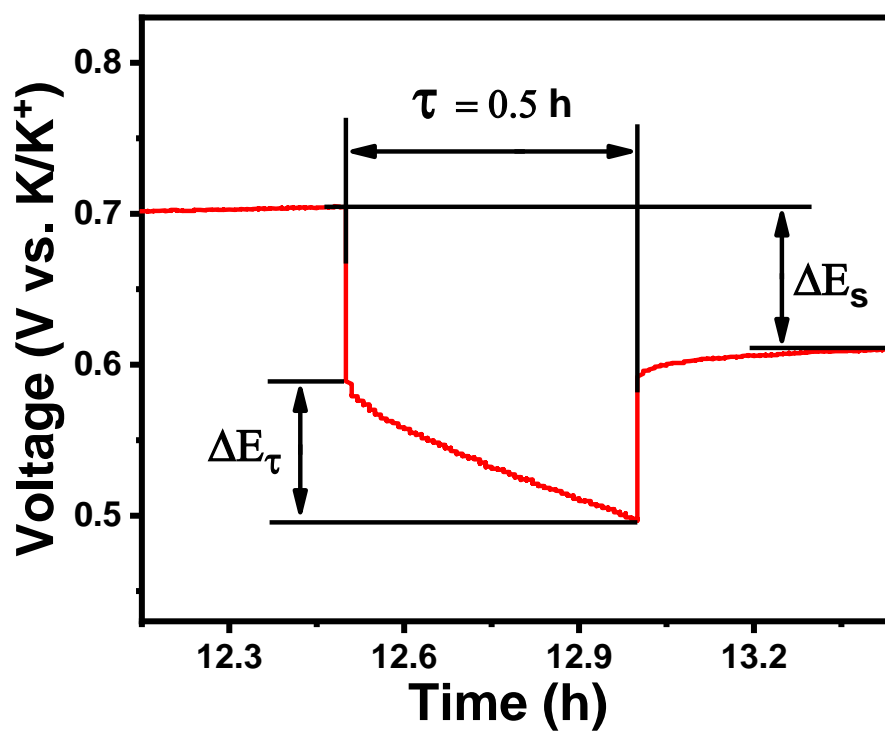

**Figure S6.** The detailed GITT profiles of N-SHC.

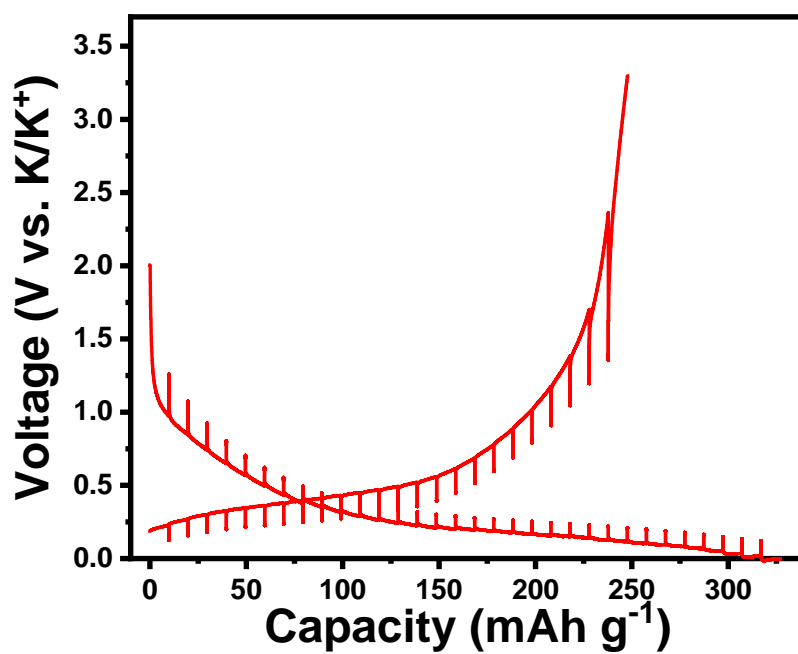

**Figure S7.** The GITT profiles of SHC.

**Table S1** Comparison of the electrochemical performance of N-doping hard carbons

| Materials | Doped atom | ICE   | Performance                                         | Ref.      |
|-----------|------------|-------|-----------------------------------------------------|-----------|
| TCNs      | Nitrogen   | 24.3% | 290.4 mAh/g at 100 mA/g<br>119.7 mAh/g at 2000 mA/g | [1]       |
| DS        | Nitrogen   | 46.9% | 168 mAh/g at 50 mA/g<br>49 mAh/g at 1000 mA/g       | [2]       |
| MS        | Nitrogen   | 39.9% | 123 mAh/g at 50 mA/g<br>30 mAh/g at 1000 mA/g       | [2]       |
| SP        | Nitrogen   | 35.7% | 139 mAh/g at 50 mA/g<br>43 mAh/g at 1000 mA/g       | [2]       |
| SCNNi     | Nitrogen   | 28.1% | 142 mAh/g at 100 mA/g                               | [3]       |
| N-CNF     | Nitrogen   | 52%   | 193 mAh/g at 50 mA/g<br>106 mAh/g at 1000 mA/g      | [4]       |
| SHPNC     | Nitrogen   | -     | 273 mAh/g at 50 mA/g<br>78 mAh/g at 5000 mA/g       | [5]       |
| NMC       | Nitrogen   | 37.7% | 301.9 mAh/g at 50 mA/g<br>133.3 mAh/g at 5000 mA/g  | [6]       |
| N-SHC     | Nitrogen   | 53%   | 251 mAh/g at 200 mA/g<br>93 mAh/g at 1000 mA/g      | This work |

[1] Zhu L F, Zhang Z, Zhang H, et al. Tunable 2D tremella-derived carbon nanosheets with enhanced pseudocapacitance behavior for ultrafast potassium-ion storage. *Science China Technological Sciences*, 2021, 64(9): 2047-2056.

[2] Wang X, Zhao J, Yao D, et al. Bio-derived hierarchically porous heteroatoms doped-carbon as anode for high performance potassium-ion batteries. *Journal of Electroanalytical Chemistry*, 2020, 871: 114272.

- [3] Deng Q, Liu H, Zhou Y, et al. N-doped three-dimensional porous carbon materials derived from bagasse biomass as an anode material for K-ion batteries. *Journal of Electroanalytical Chemistry*, 2021, 899: 115668.
- [4] Ma L, Li J, Li Z, et al. Ultra-stable potassium ion storage of nitrogen-doped carbon nanofiber derived from bacterial cellulose. *Nanomaterials*, 2021, 11(5): 1130.
- [5] Luo H, Chen M, Cao J, et al. Cocoon silk-derived, hierarchically porous carbon as anode for highly robust potassium-ion hybrid capacitors. *Nano-micro Letters*, 2020, 12(1): 1-13.
- [6] Qiu Z, Zhao K X, Liu J, et al. Nitrogen-doped mesoporous carbon as an anode material for high performance potassium-ion batteries. *Electrochimica Acta*, 2020, 340: 135947.
